# Supplementary material for: Caloric restriction augments radiation efficacy in breast cancer
Source: PubMed Central journal article supplement — Cell Cycle. 2013 May 21;12(12):1955–63. doi: 10.4161/cc.25016 (PMC3735710; doi:10.4161/cc.25016), 2013-05-21

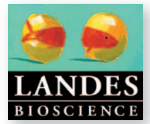

## **Supplemental Material to:**

**Anthony D. Saleh, Brittany A. Simone, Juan Palazzo,  
Jason E. Savage, Yuri Sano, Tu Dan, Lianjin Jin, Colin  
Champ, Shuping Zhao, Meng Lim, Frederica Sotgia, Kevin  
Camphausen, Richard G. Pestell, James B. Mitchell, Michael  
P. Lisanti and Nicole L. Simone**

**Caloric restriction augments radiation efficacy in breast  
cancer**

**2013; 12(12)**

**<http://dx.doi.org/10.4161/cc.25016>**

**<http://www.landesbioscience.com/journals/cc/article/25016>**

Figure S1

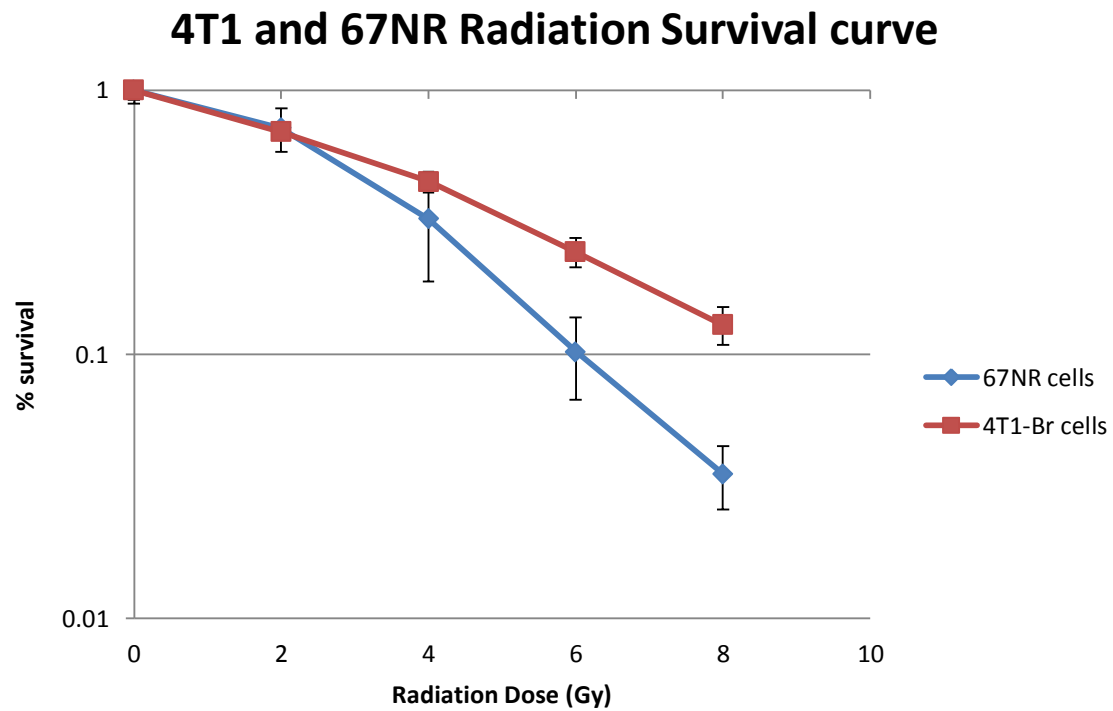

Supplement: cc-12-1955-s01.pdf [file cc-12-1955-s01.pdf]
